# Supplementary material
Source: PubMed Central journal article supplement (PMC3490581)

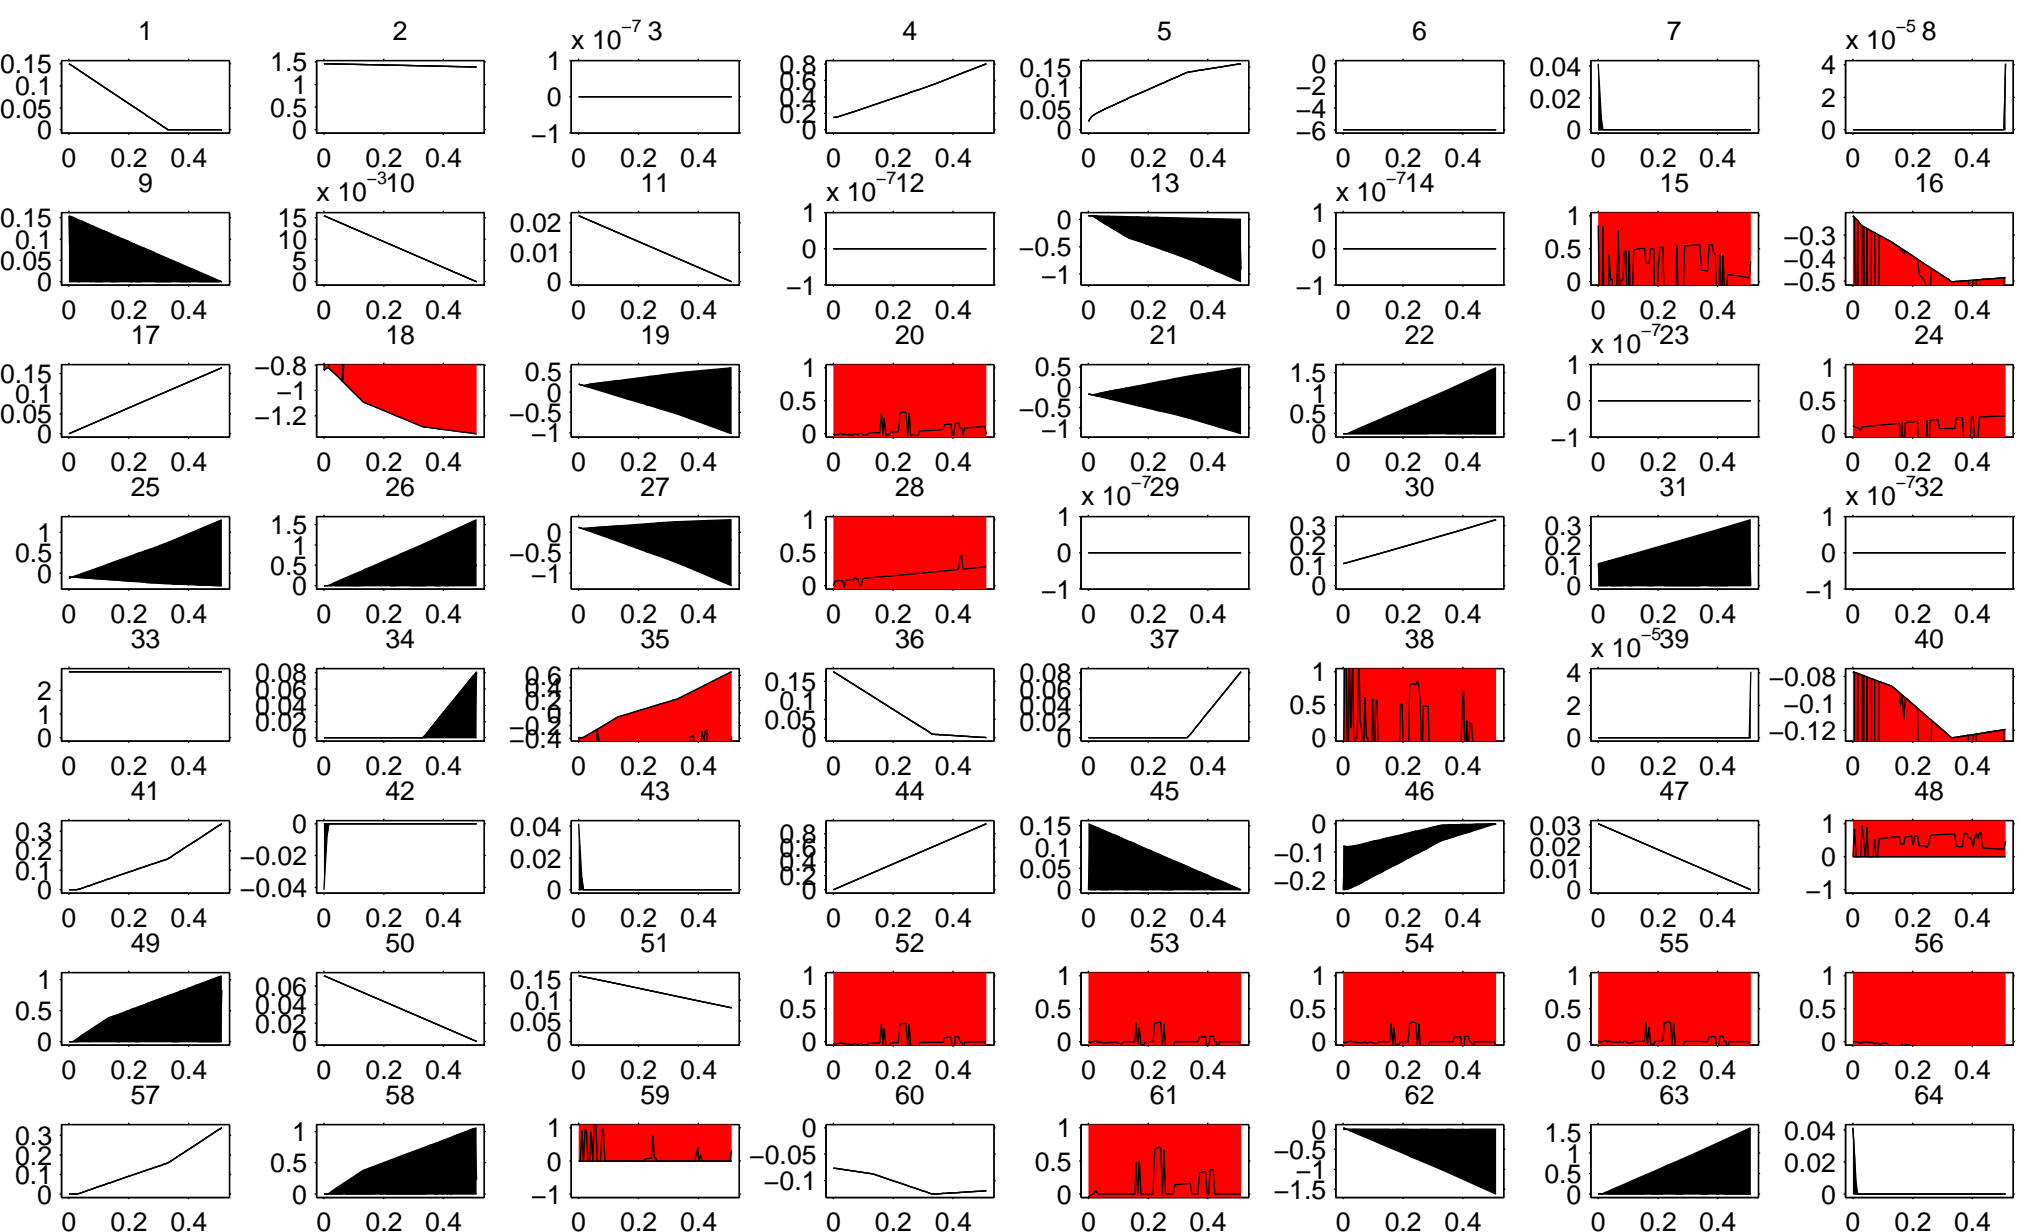



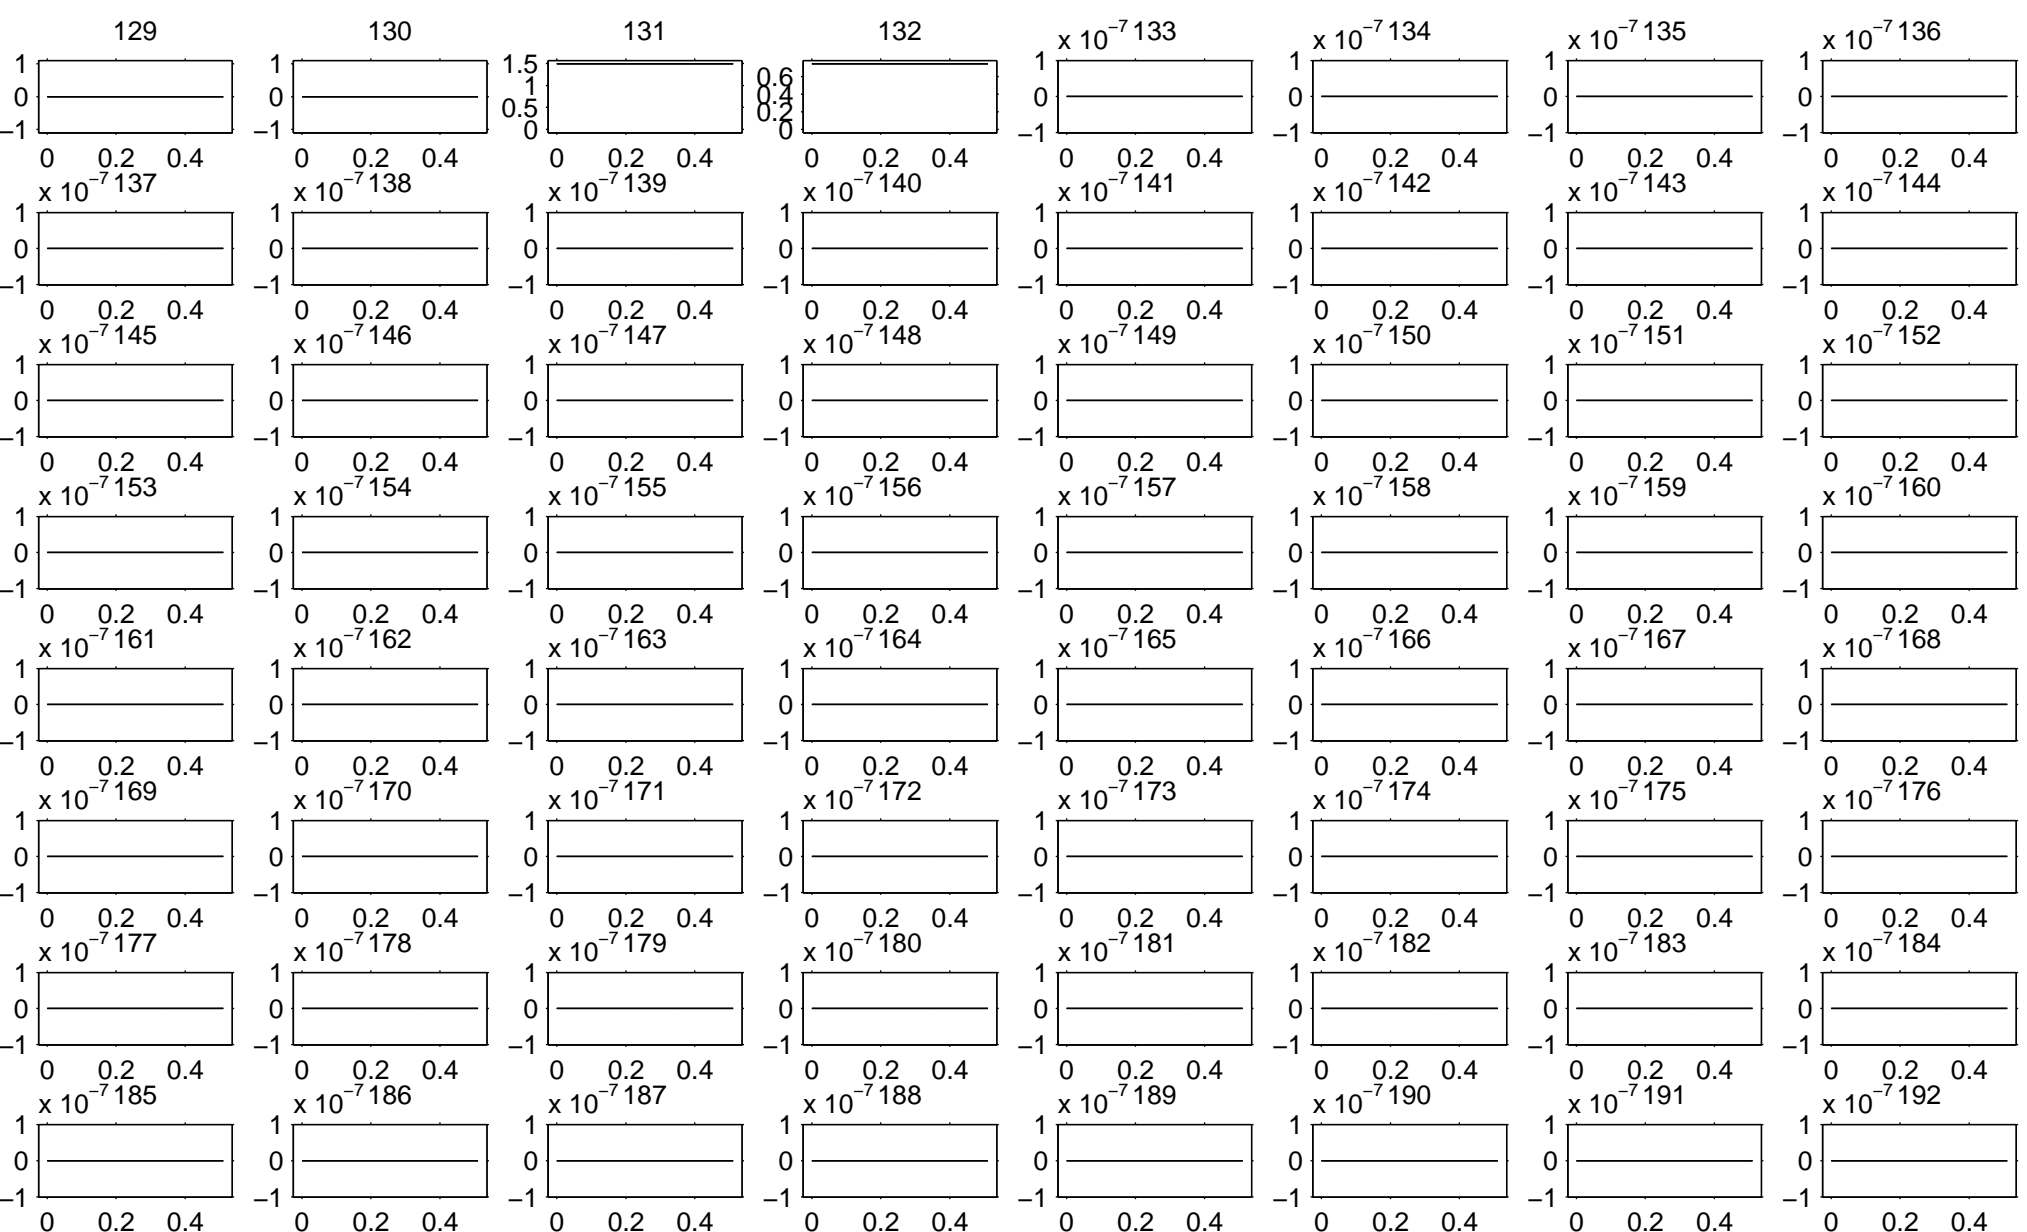

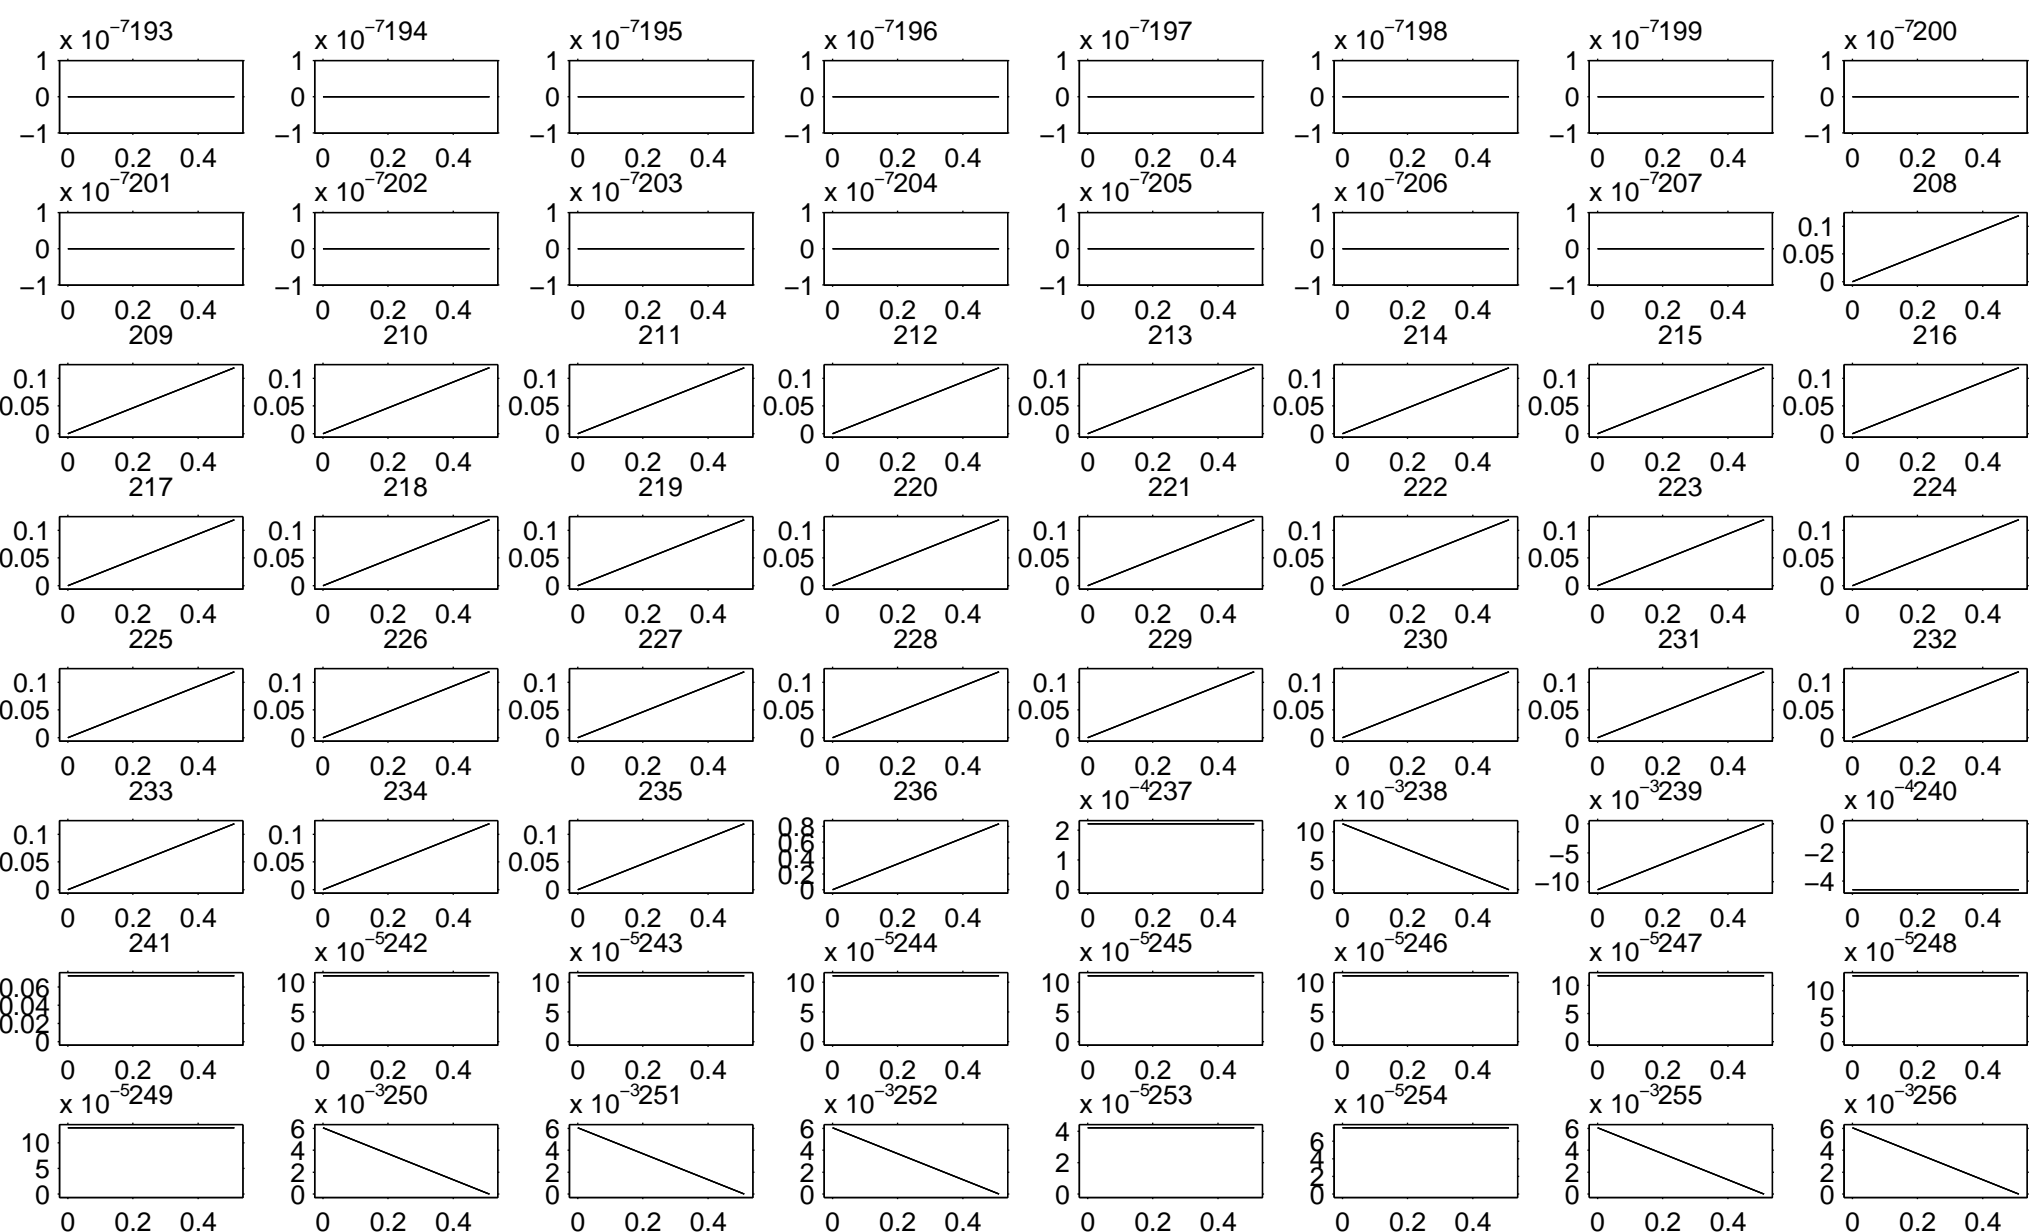

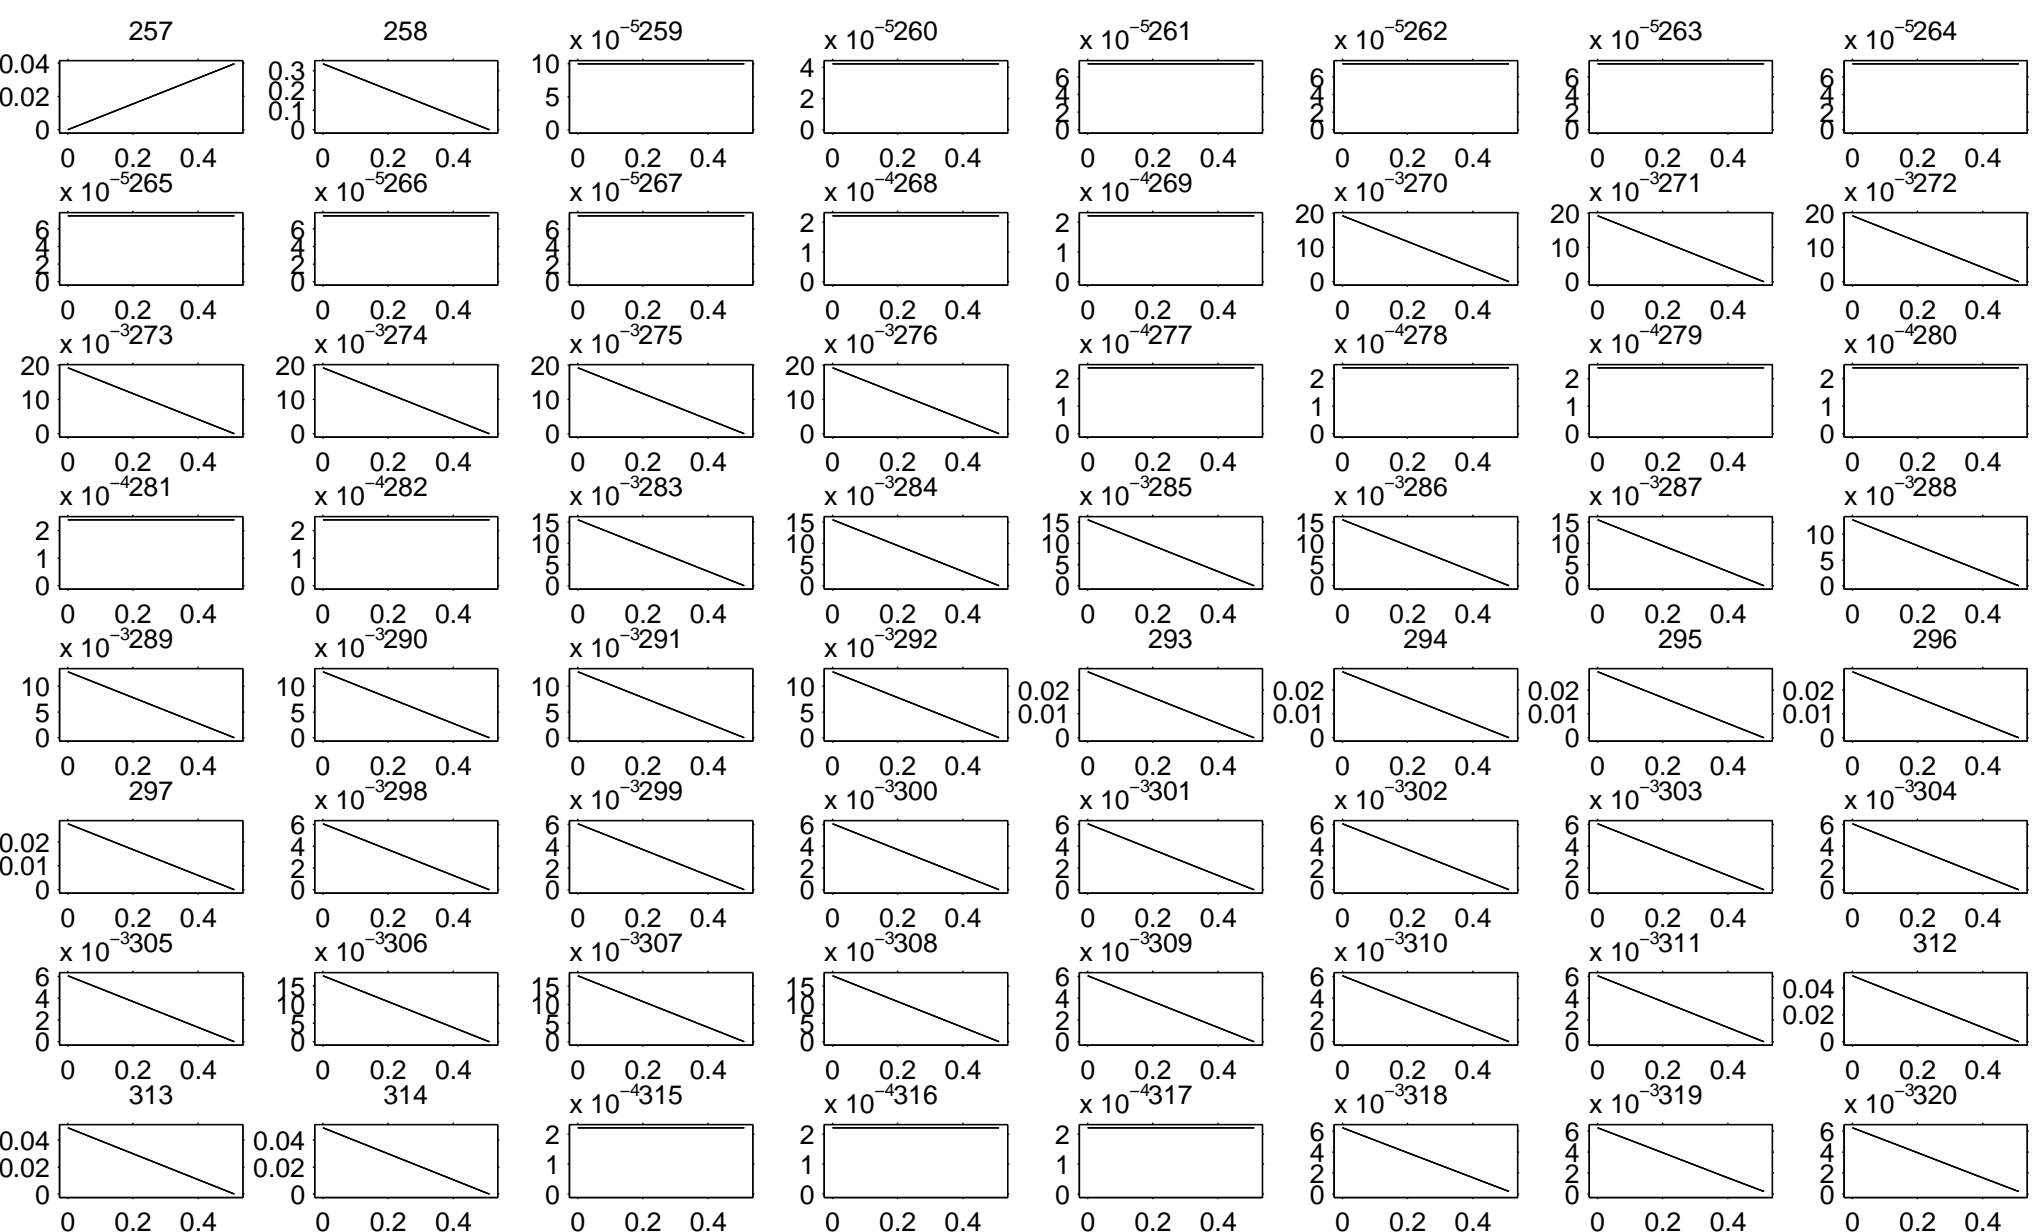

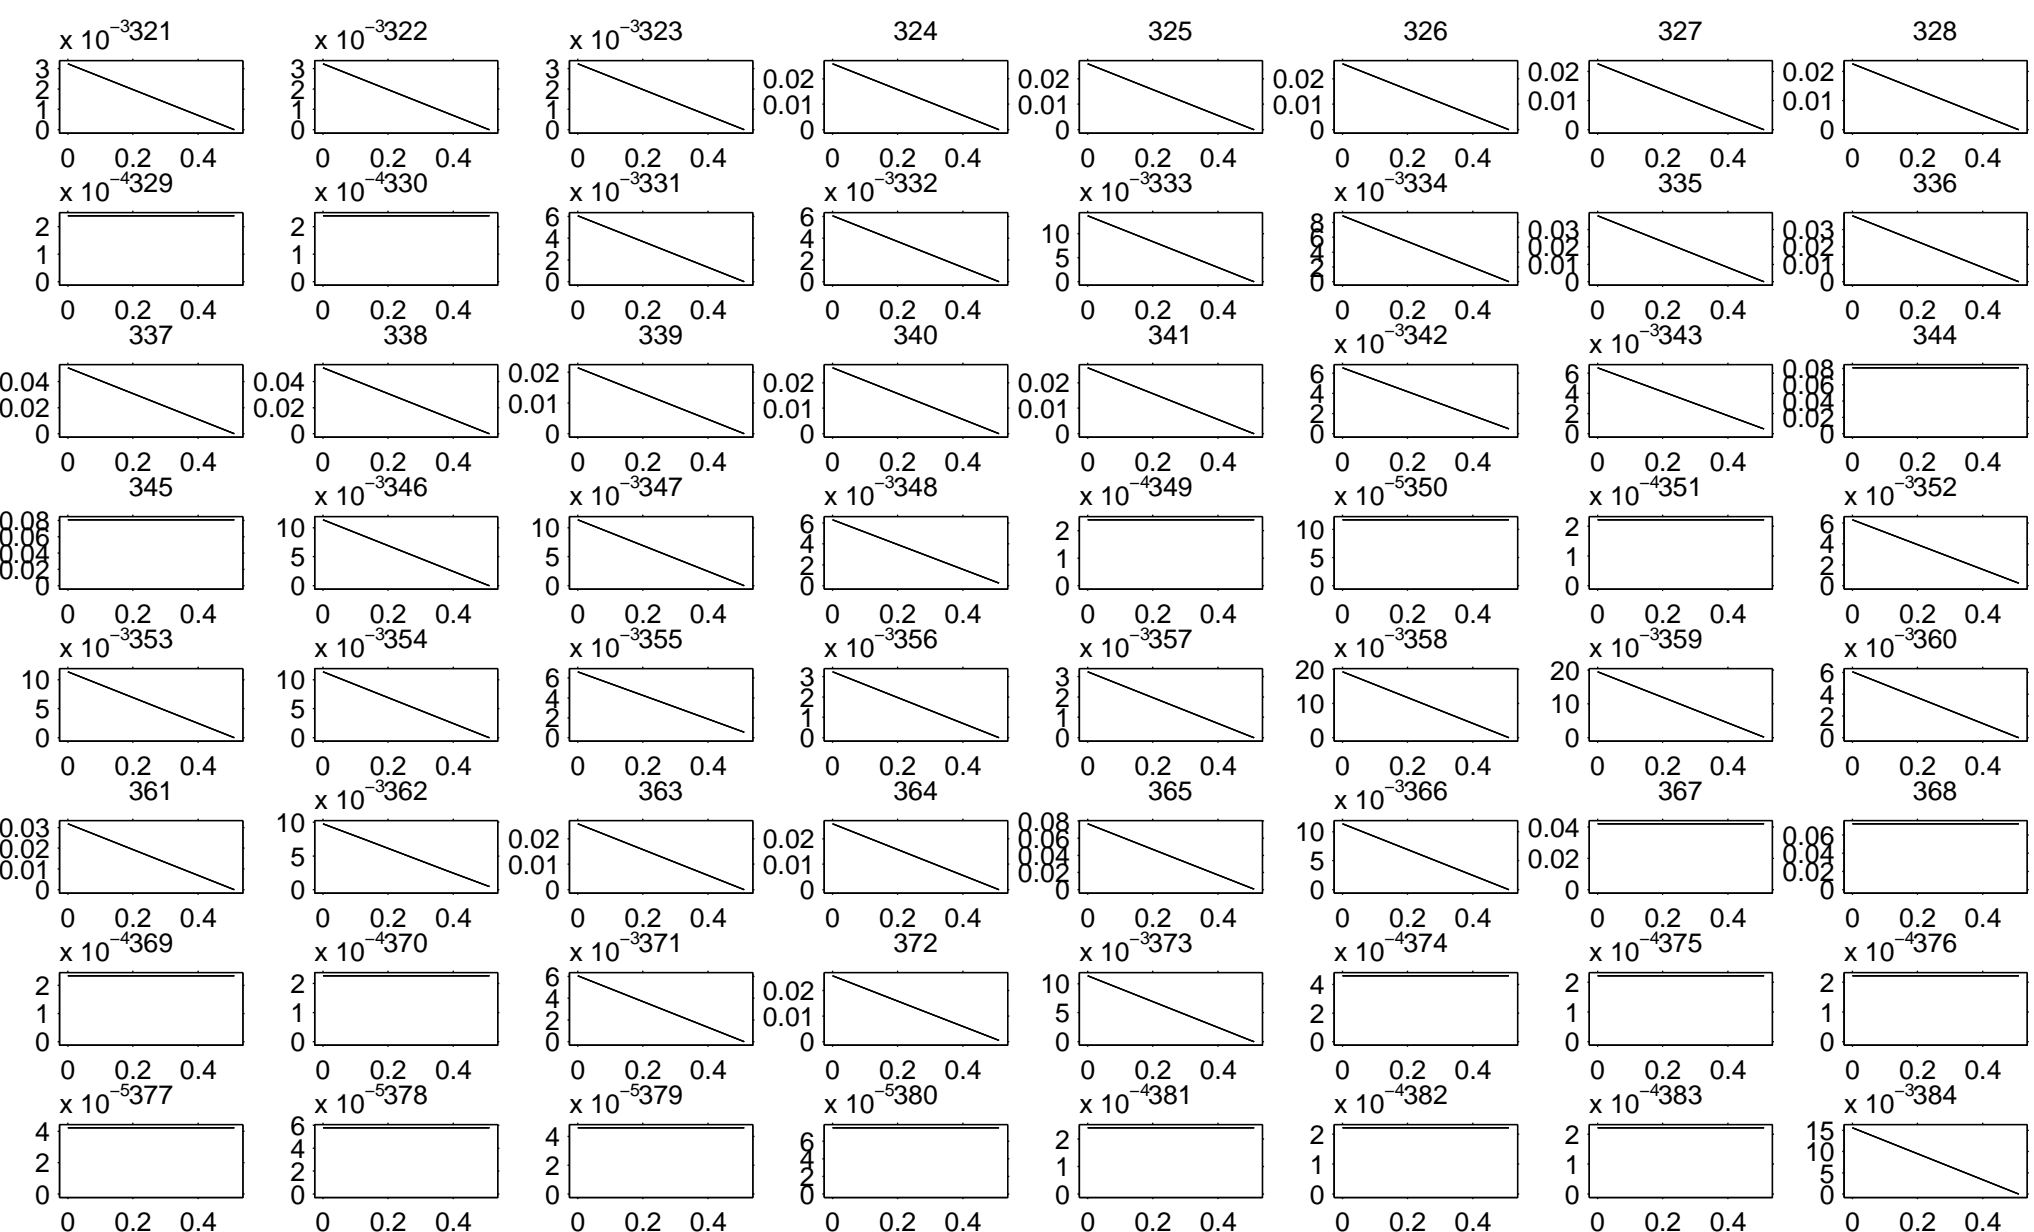

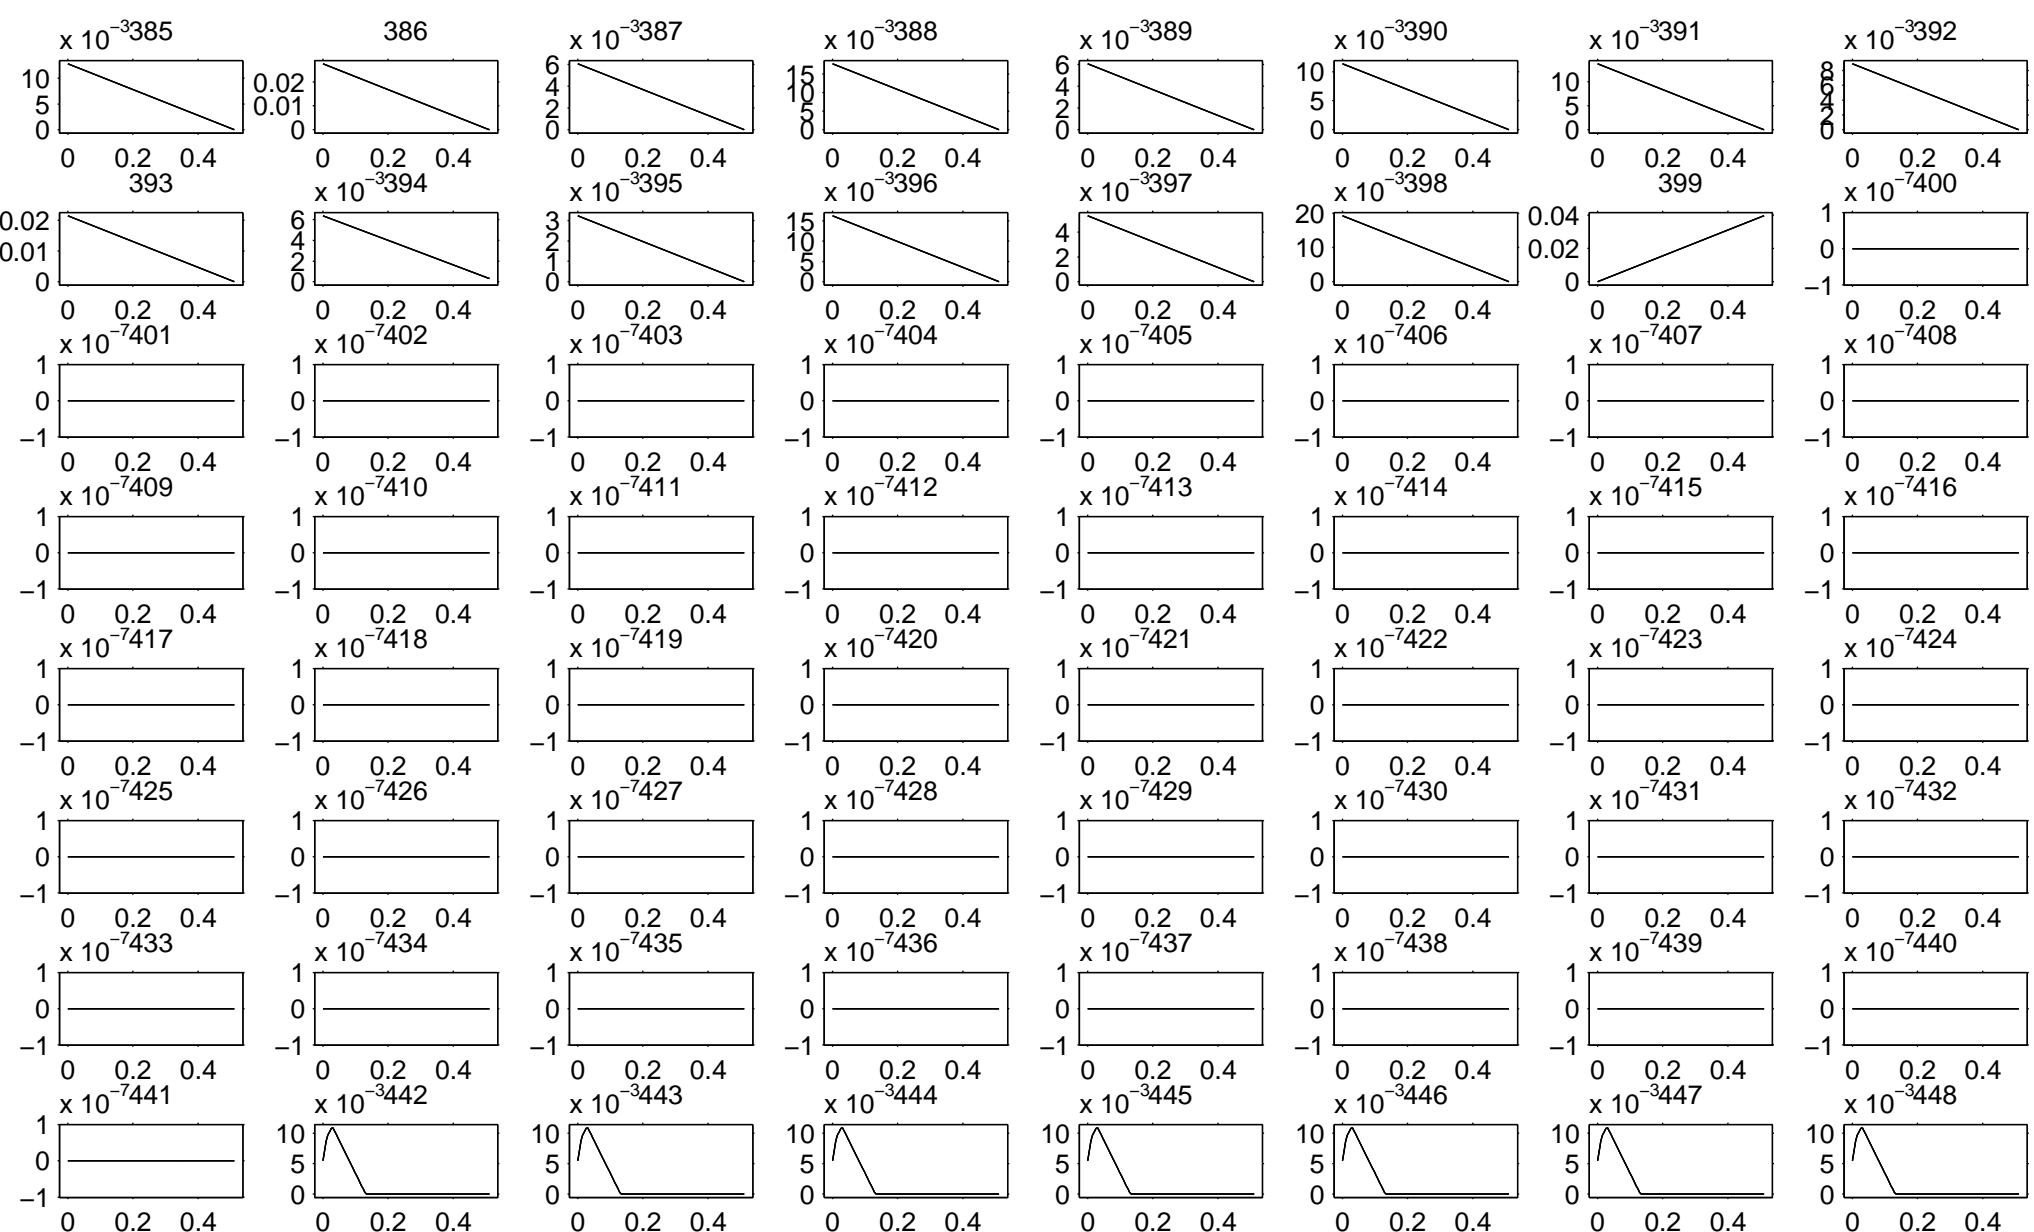

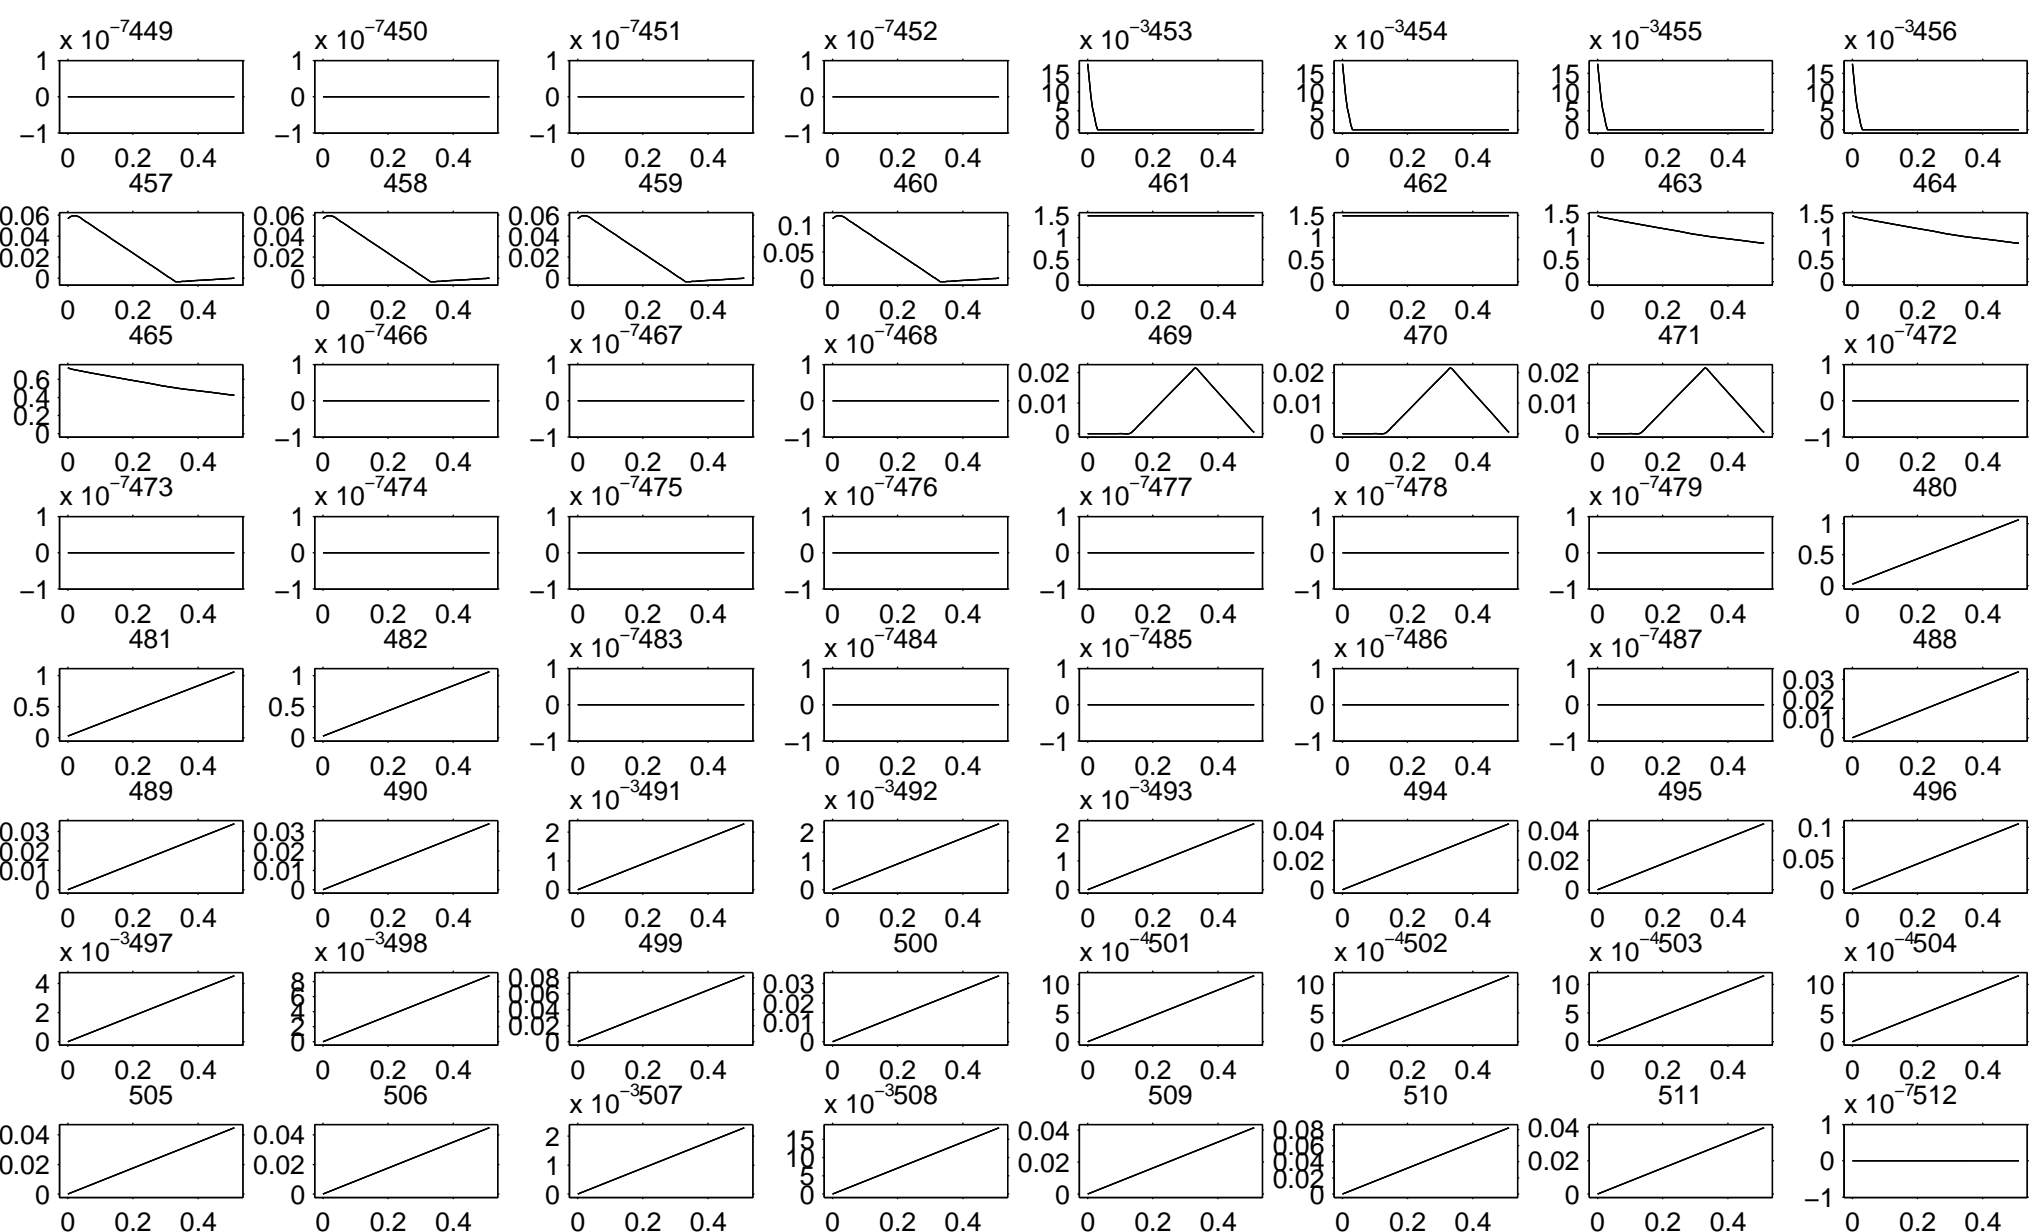



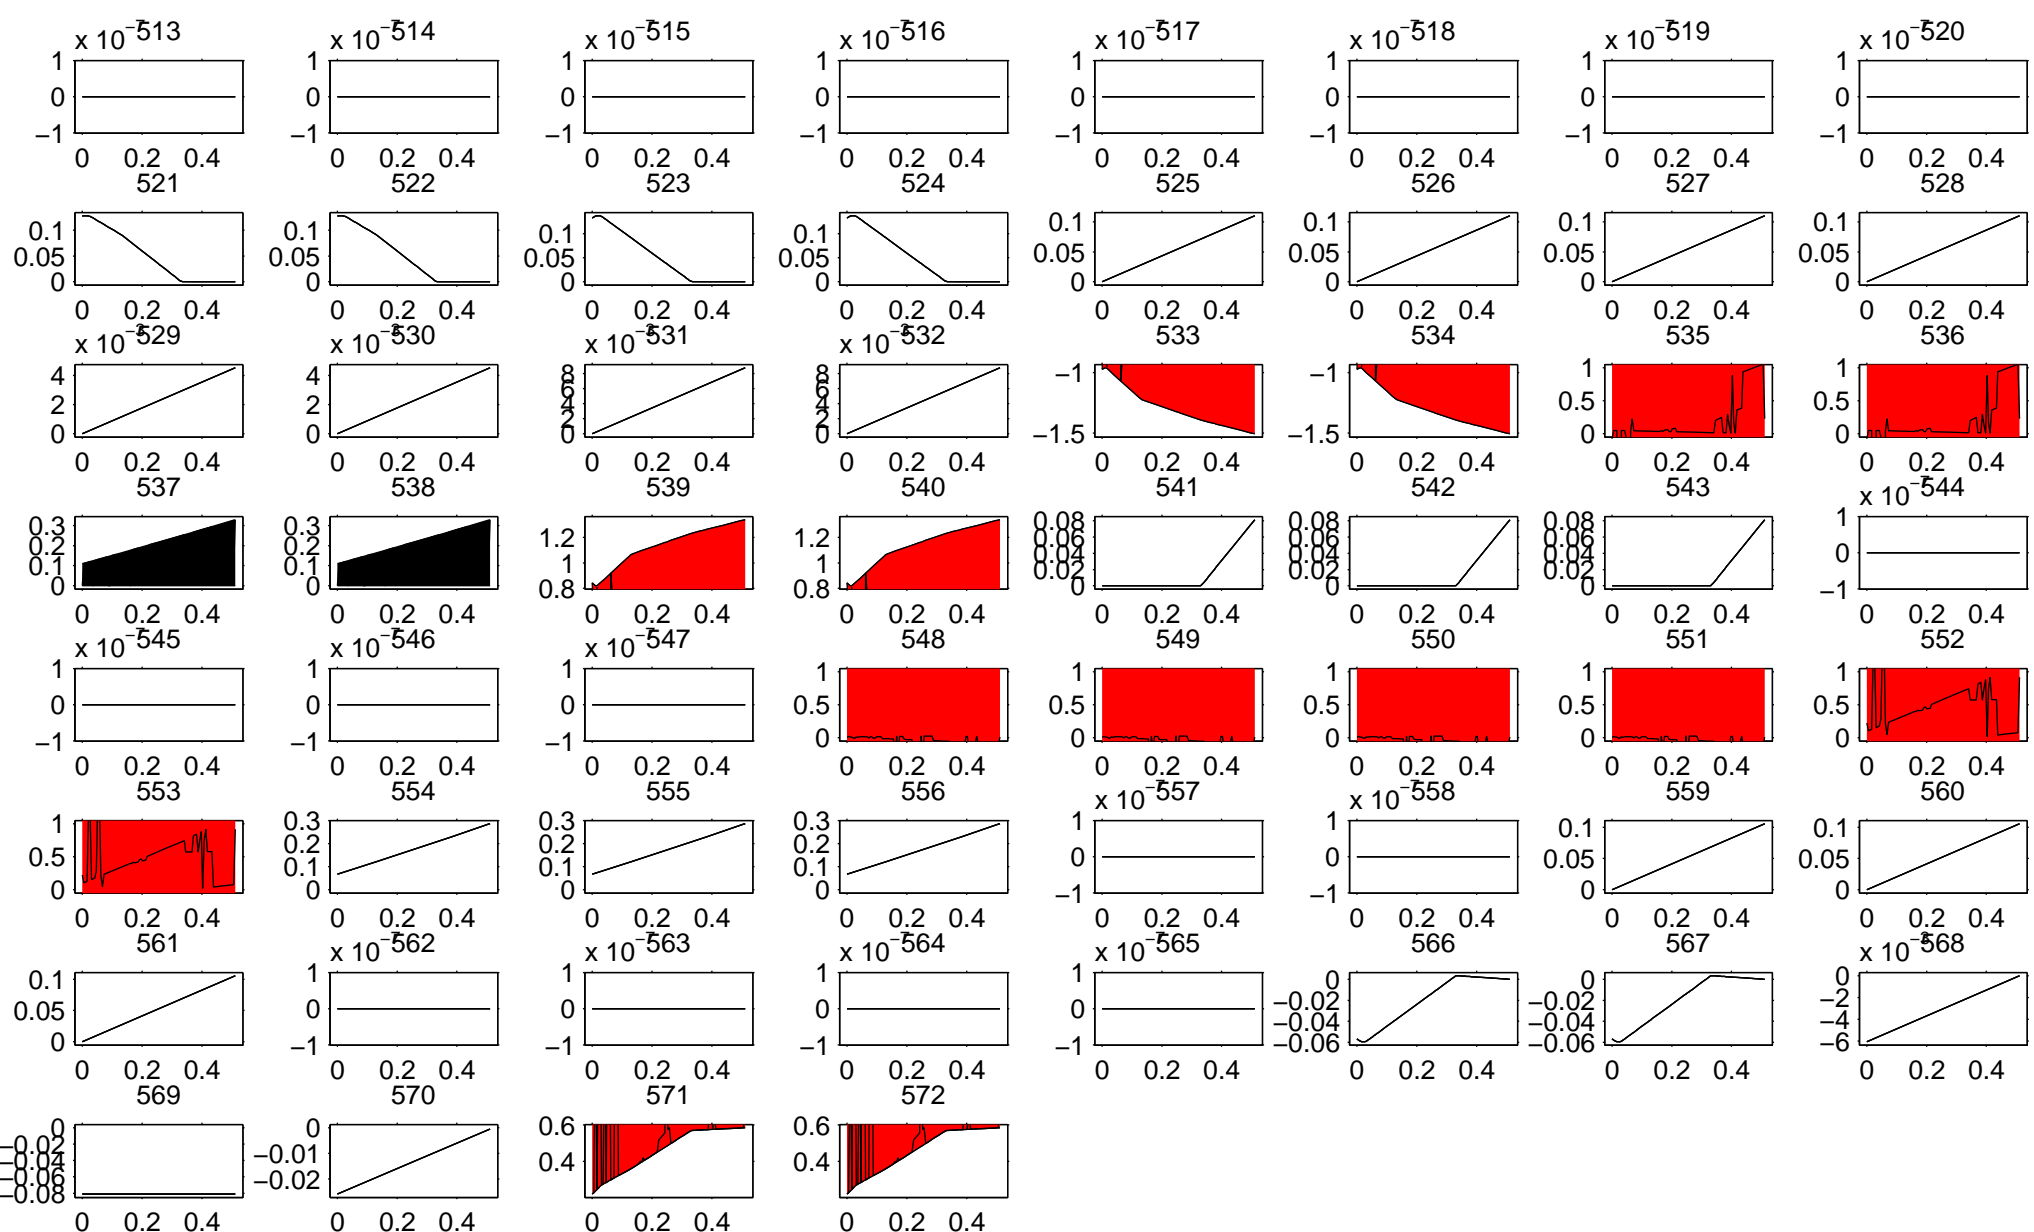

Supplement: supp_pp.112.203927_203927Figure_S1.pdf [file supp_pp.112.203927_203927Figure_S1.pdf]
